# Supplementary material for: Long non-coding RNA expression profiles of hepatitis C virus-related dysplasia and hepatocellular carcinoma
Source: PubMed Central journal article supplement (PMC4791265; doi:10.18632/oncotarget.6087), 2015-10-26
Supplement: oncotarget-06-43770-s001.pdf [file oncotarget-06-43770-s001.pdf]

## **SUPPLYMENTRY TABLES**

**Supplementary File S1: The list of differentially expressed genes between preneoplastic lesions and HCC.**

**Supplementary Table S1: Functional enrichment result of up-regulated protein coding gene in HCC samples**

**Supplementary Table S2: Functional enrichment result of down-regulated protein coding gene in HCC samples**

**Supplementary Table S3: Functional enrichment result of the module containing LINC01419 and AK021443**

**Supplementary Table S4: Functional enrichment result of the AF070632-centered subnetwork**
